# Supplementary material for: Should Artificial Intelligence be used to support clinical ethical decision-making? A systematic review of reasons
Source: PubMed Central journal article supplement (PMC10327319; doi:10.1186/s12910-023-00929-6), 2023-07-06
Supplement: 12910_2023_929_MOESM2_ESM.pdf [file 12910_2023_929_MOESM2_ESM.pdf]

# List of Codes

| Topic                                                            | Codings | included in (numbers according to supplement "included publications")       |
|------------------------------------------------------------------|---------|-----------------------------------------------------------------------------|
|                                                                  | 552     |                                                                             |
| <b>Autonomy</b>                                                  | 273     |                                                                             |
| <u>Prediction Accuracy</u>                                       |         |                                                                             |
| <b>pro</b>                                                       |         |                                                                             |
| Superior accuracy of predictions compared to existing methods    | 48      | 2, 5, 6, 15, 16, 18, 19, 20, 21, 22, 23, 25, 28, 31, 34, 35, 36, 40, 43, 44 |
| Surrogates predict patient preferences incorrectly               | 20      | 4, 6, 16, 18, 19, 25, 34, 36, 41, 43, 44                                    |
| Surrogates predict preference no more accurate than chance       | 13      | 18, 19, 20, 23, 25, 26, 28, 31, 35, 36,                                     |
| AI helps to improve surrogate decision-making                    | 8       | 4, 18, 20, 21, 36                                                           |
| AI prediction is valuable information, even if not 100% accurate | 3       | 2, 20, 21                                                                   |
| Surrogates' predicitions less accurate than AI predictions       | 1       | 21                                                                          |
| Patient Preference isn't detected through conventional methods   | 1       | 36                                                                          |
| Advance directive more likely to be outdated than AI-Predictions | 1       | 36                                                                          |
| <b>contra</b>                                                    |         |                                                                             |
| AI does not improve accuracy (on controversial cases)            | 7       | 12, 20, 23                                                                  |
| Decisions have to be made for the right reasons                  | 5       | 15, 21                                                                      |
| Previously expressed values do not equal later choices           | 5       | 14, 32, 34, 36                                                              |
| Instability of preferences limits any prediction model           | 4       | 13, 23, 34                                                                  |
| Accuracy of predictions is not as important as well-being        | 3       | 6, 18                                                                       |
| Unlikely for AI-prediction to match ground-truth completely      | 3       | 2, 28                                                                       |
| Accuracy of Prediction models impossible to be validated         | 2       | 23                                                                          |
| AI can only be accurate with sufficient information on patient   | 2       | 18, 35                                                                      |
| Prediction susceptible to forecasting errors                     | 1       | 28                                                                          |
| Accuracy of predictions is not as important as who decides       | 1       | 26                                                                          |
| AI accuracy cant be verified in incapacitated patients           | 1       | 36                                                                          |
| AI predictions may be broader than clinical case requires        | 1       | 35                                                                          |
| <u>Autonomy of decision makers</u>                               |         |                                                                             |
| <b>pro</b>                                                       |         |                                                                             |
| AI improves transparency of ethical decision-making              | 4       | 12, 29                                                                      |
| Systems augment deliberative capacity                            | 4       | 5, 25                                                                       |
| AI can expand the available lines of action for clinicians       | 1       | 17                                                                          |
| AI helps stakeholders understand decision of similar people      | 1       | 4                                                                           |
| <b>contra</b>                                                    |         |                                                                             |
| AI might undermine the role of the ethicist                      | 3       | 8, 9                                                                        |
| AI might undermine the role of surrogates                        | 3       | 16, 35                                                                      |
| Stakeholders can manipulate AI to their own advantage            | 1       | 35                                                                          |
| AI will not be entirely controllable                             | 1       | 29                                                                          |

## List of Codes

|                                                                                        |    |                               |
|----------------------------------------------------------------------------------------|----|-------------------------------|
| <u>Conventional surrogate decision-making poses negative implications for patients</u> |    |                               |
| pro                                                                                    |    |                               |
| Use of AI can help avoid unwanted treatment                                            | 4  | 4, 20, 25                     |
| <u>Analysis of Health Data</u>                                                         |    |                               |
| pro                                                                                    |    |                               |
| AI has to be trained just once                                                         | 1  | 25                            |
| Wider range of predictors than Human-run studies                                       | 1  | 25                            |
| Larger data samples than human-run studies                                             | 1  | 25                            |
| Faster analysis than human-run studies                                                 | 1  | 25                            |
| contra                                                                                 |    |                               |
| Ethics consultation data is not plentiful enough to require AI                         | 2  | 8                             |
| <u>Respect for Autonomy</u>                                                            |    |                               |
| pro                                                                                    |    |                               |
| High acceptance of AI in stakeholders                                                  | 11 | 16, 18, 19, 20, 35, 44        |
| AI can ensure that patients get the treatment they prefer                              | 10 | 16, 18, 20, 34, 35, 41        |
| Improved respect for Autonomy                                                          | 8  | 13, 15, 20, 25, 35, 36        |
| Empirical Prediction > "best interest" abstraction                                     | 2  | 15, 20                        |
| AI-advice can enhance patient autonomy                                                 | 2  | 2, 36                         |
| AI predictions supply morally acceptable basis for decision-making                     | 1  | 14                            |
| Informed patients would not want to overburden their family                            | 1  | 36                            |
| Deferring to AI does not undermine deliberative capacity                               | 1  | 19                            |
| Patient autonomy > having a family member decide                                       | 1  | 19                            |
| Sense of identity (provided by AI) > best interests prediction                         | 1  | 15                            |
| AI recommendations can provide legitimation for actions                                | 1  | 2                             |
| AI can help clinicians to protect patient autonomy                                     | 1  | 35                            |
| contra                                                                                 |    |                               |
| Process could limit patients' autonomy                                                 | 12 | 4, 16, 20, 22, 28, 32, 36, 39 |
| Statistical correlation does not equal personal decision                               | 10 | 15, 16, 20, 23, 28, 41, 44    |
| The right choice being made is not sufficient for autonomy                             | 6  | 20, 23, 27, 32, 34            |
| Some patients may not have preferences to predict                                      | 5  | 23, 34                        |
| Entrusting surrogates with decisions is a form of autonomy                             | 4  | 23, 34                        |
| Automating the decision-making-process is dehumanizing                                 | 3  | 13, 19                        |
| Predicting someones preferences limits their autonomy                                  | 2  | 41, 42                        |
| AI can enforce stereotyping                                                            | 2  | 21, 36                        |
| Low acceptance of ethics AI tools in general public                                    | 2  | 20, 29                        |
| Surrogates more likely decide based on reasons patients endorse                        | 2  | 21, 34                        |
| Low acceptance of ethics AI tools in clinicians                                        | 1  | 2                             |

## List of Codes

|                                                                         |     |                                               |
|-------------------------------------------------------------------------|-----|-----------------------------------------------|
| Systematic use of AI may harm autonomy significantly                    | 1   | 39                                            |
| Making decisions yourself is an essential part of autonomy              | 1   | 26                                            |
| Accuracy does not legitimize predictions                                | 1   | 23                                            |
| <u>Surrogates</u>                                                       |     |                                               |
| pro                                                                     |     |                                               |
| Advance directives fail to match treatment to preferences               | 3   | 16, 35, 36                                    |
| Advance directive are oftentimes not available                          | 3   | 16, 34, 35                                    |
| Reliance on family based on wrong assumption of accuracy                | 2   | 21, 36                                        |
| "the autonomy algorithm is truly patient centered"                      | 2   | 25                                            |
| Physicians fail to match treatment plan to patients preference          | 2   | 25, 36                                        |
| Surrogates may have limited knowledge of preferences                    | 1   | 16                                            |
| Advance directives may not include relevant information                 | 1   | 16                                            |
| Only a part of Patients want their families to decide for them          | 1   | 20                                            |
| contra                                                                  |     |                                               |
| The Family should be in charge of decisions, not AI                     | 4   | 19, 20, 40, 44                                |
| What is best for the loved ones has to be considered in decision-making | 2   | 6, 20                                         |
| Surrogates should be in charge of decisions, not AI                     | 2   | 18                                            |
| Beneficence                                                             | 128 |                                               |
| <u>Wellbeing of Surrogates</u>                                          |     |                                               |
| pro                                                                     |     |                                               |
| Reduced emotional strain on Surrogates                                  | 19  | 4, 16, 18, 19, 20, 25, 26, 34, 35, 36, 40, 44 |
| "offer relief from burden posed by incapacitated patients"              | 6   | 13, 25, 35, 36, 44                            |
| surrogate "rest a little easier" when AI supports the decision          | 3   | 25, 35, 36                                    |
| AI helps surrogates not to feel alone with decisions                    | 2   | 16, 18                                        |
| AI facilitates cognitive burden for doctors                             | 1   | 2                                             |
| Reduced burnout of surrogates                                           | 1   | 25                                            |
| "An algorithm will not lose sleep" (over important decisions)           | 1   | 25                                            |
| contra                                                                  |     |                                               |
| AI does not decrease surrogates' decisional burden                      | 1   | 20                                            |
| <u>Economic Considerations</u>                                          |     |                                               |
| pro                                                                     |     |                                               |
| AI saves healthcare resources                                           | 5   | 8, 17, 28, 38                                 |
| Existing methods are resource intensive                                 | 4   | 25, 28                                        |
| Economic Gains for society                                              | 2   | 25                                            |
| contra                                                                  |     |                                               |
| Ethicists' labor costs not significant enough to be reduced             | 1   | 8                                             |
| <u>Surrogates</u>                                                       |     |                                               |

## List of Codes

|                                                                  |   |                       |
|------------------------------------------------------------------|---|-----------------------|
| <b>contra</b>                                                    |   |                       |
| Surrogates concerned that AI does not reflect the individual     | 1 | 35                    |
| Overriding the familial surrogate right is impermissible         | 1 | 19                    |
| Families as surrogates have great interest in patients' good     | 1 | 19                    |
| <u>Normative Enhancement</u>                                     |   |                       |
| <b>pro</b>                                                       |   |                       |
| "Cognitive moral enhancement"                                    | 5 | 11, 30, 33, 38        |
| AI may advance the study of ethical theory                       | 4 | 2, 11, 30, 38         |
| Computational extension of moral methods                         | 3 | 11, 22                |
| AI provides normative transparency                               | 2 | 11, 30                |
| AI constitutes a way to train our "moral orientation"            | 1 | 2                     |
| AI could promote rational dissensus                              | 1 | 12                    |
| AI can promote the common good                                   | 1 | 37                    |
| <b>contra</b>                                                    |   |                       |
| Normative enhancement through AI is unnecessary                  | 1 | 38                    |
| <u>Quality of Support</u>                                        |   |                       |
| <b>pro</b>                                                       |   |                       |
| AI might improve the process of surrogate decision-making        | 8 | 2, 14, 18, 35, 36, 44 |
| AI enhances availability of ethical support                      | 4 | 12, 20, 24, 25        |
| AI predictions enable faster treatment decisions                 | 4 | 16, 35, 36            |
| AI offers new factors to consider in surrogate decision-making   | 4 | 16, 18                |
| AI is faster than human intelligence                             | 3 | 7, 20, 33             |
| Processing power enables better support                          | 3 | 4, 37                 |
| AI has better judgement than singular clinician/committee        | 3 | 12, 19                |
| AI may help in otherwise overwhelming situations                 | 3 | 4, 17, 29             |
| Existing methods consider only small patient cohorts             | 2 | 25                    |
| AI aims to facilitate informed decision-making                   | 2 | 10, 36                |
| AI is more consistent than human intelligence                    | 2 | 7, 33                 |
| AI may increase physician and patient welfare                    | 1 | 36                    |
| AI predictions are easy and fast to document                     | 1 | 2                     |
| AI enables "wisdom of crowds" for individual decision-making     | 1 | 2                     |
| <b>contra</b>                                                    |   |                       |
| AI decision-making is not fully comprehensive of moral processes | 6 | 8, 29, 30, 38, 42, 43 |
| Assisitive AI poses no clear benefit                             | 2 | 2, 8                  |
| AI is unable to act empathetic                                   | 2 | 24, 30                |
| AI cant feel "moral regret and residual obigation"               | 2 | 7, 30                 |
| Human input is essential for ethical tasks                       | 1 | 3                     |

## List of Codes

|                                                                            |           |                                               |
|----------------------------------------------------------------------------|-----------|-----------------------------------------------|
| Humans are better suited for actual ethic work                             | 1         | 3                                             |
| AI can be unreliable                                                       | 1         | 2                                             |
| AI decision-making inferior to human decision-making                       | 1         | 29                                            |
| AI is unable to take structural knowledge into account                     | 1         | 2                                             |
| AI could learn to emulate ethics committees, but not exceed them           | 1         | 12                                            |
| AI does not spare time                                                     | 1         | 38                                            |
| Reliance on AI can undermine the providers competency                      | 1         | 37                                            |
| <b>Non-Maleficence</b>                                                     | <b>56</b> |                                               |
| <u>Conventional methods pose health risks for stakeholders</u>             |           |                                               |
| <b>pro</b>                                                                 |           |                                               |
| Surrogate stress, mental health problems                                   | 19        | 4, 13, 16, 18, 20, 25, 26, 34, 35, 36, 43, 44 |
| Surrogate decision-making takes time, delays preferred treatment           | 1         | 36                                            |
| Conventional methods induce health care professional burnout               | 1         | 25                                            |
| <b>contra</b>                                                              |           |                                               |
| AI may increase surrogate stress                                           | 6         | 13, 16, 26, 35                                |
| <u>decision-making-processes</u>                                           |           |                                               |
| <b>contra</b>                                                              |           |                                               |
| De-Skilling                                                                | 3         | 2, 17, 30                                     |
| AI can enforce cognitive biases                                            | 2         | 6                                             |
| AI can reinforce current flaws in decision-making                          | 2         | 4, 6                                          |
| AI tools can be used to deny expensive care                                | 1         | 18                                            |
| Having choices by patients with capacity imposed on others could harm them | 1         | 14                                            |
| AI does not care about others                                              | 1         | 7                                             |
| negative impact on complex human communication                             | 1         | 38                                            |
| AI can introduce new flaws in decision-making                              | 1         | 4                                             |
| AI may "streamline" ethical advancement                                    | 1         | 38                                            |
| <u>Surrogates</u>                                                          |           |                                               |
| <b>pro</b>                                                                 |           |                                               |
| Surrogates mistake their own for the patients' preferences                 | 2         | 16, 19                                        |
| Surrogates might be ill-prepared for their role                            | 2         | 16, 18                                        |
| Surrogate decision-making biased by interaction with other loved ones      | 1         | 16                                            |
| AI keeps surrogates from bruteforcing their own preferences                | 1         | 18                                            |
| AI reduces distorting biases in Surrogates                                 | 1         | 36                                            |
| Surrogate decision-making leads to the patients perspective being excluded | 1         | 43                                            |
| Surrogate may have psychological conditions impairing judgement            | 1         | 19                                            |
| Surrogates do not understand the patients clinical status                  | 1         | 19                                            |
| Surrogates do not understand their role                                    | 1         | 18                                            |

## List of Codes

|                                                                                       |           |                                         |
|---------------------------------------------------------------------------------------|-----------|-----------------------------------------|
| <b>contra</b>                                                                         |           |                                         |
| AI may increase decision-making burden                                                | 2         | 18, 35                                  |
| AI may undermine surrogates' decisional confidence                                    | 2         | 26, 35                                  |
| Surrogate bias may be adopted by AI                                                   | 1         | 35                                      |
| <b>Justice</b>                                                                        | <b>55</b> |                                         |
| <b>Bias</b>                                                                           |           |                                         |
| <b>pro</b>                                                                            |           |                                         |
| AI can decrease biases in decision-making                                             | 6         | 4, 5, 16, 19                            |
| Conventional methods introduce bias                                                   | 2         | 5, 35                                   |
| <b>contra</b>                                                                         |           |                                         |
| Machine learning tools can simply reflect existing biases                             | 13        | 2, 4, 5, 16, 18, 21, 24, 25, 28, 29, 44 |
| Automation bias                                                                       | 6         | 16, 24, 30, 33                          |
| Institutions could intentionally implement biases                                     | 4         | 19, 35                                  |
| Disability Bias                                                                       | 2         | 37                                      |
| Algorithmic Bias                                                                      | 2         | 19, 24                                  |
| Anchoring bias                                                                        | 1         | 33                                      |
| <b>decision-making</b>                                                                |           |                                         |
| <b>pro</b>                                                                            |           |                                         |
| AI can increase fairness in decision-making                                           | 2         | 5, 33                                   |
| AI decision-making is objective                                                       | 2         | 5                                       |
| AI-decisions not compromised by legal implications                                    | 1         | 4                                       |
| AI can mitigate racial inequalities                                                   | 1         | 5                                       |
| <b>contra</b>                                                                         |           |                                         |
| AI can enforce inequality                                                             | 9         | 4, 10, 16, 18, 21, 25, 34               |
| AI decisions may require additional human input                                       | 3         | 16, 33, 38                              |
| AI can decrease fairness in decision-making                                           | 1         | 16                                      |
| <b>Explicability</b>                                                                  | <b>20</b> |                                         |
| <b>decision-making</b>                                                                |           |                                         |
| <b>pro</b>                                                                            |           |                                         |
| AI decision-making doesn't have to be explicable as humans decision-making is neither | 2         | 2, 30                                   |
| <b>contra</b>                                                                         |           |                                         |
| Lack of transparency of AI                                                            | 3         | 16, 17                                  |
| Lack of explicability of AI                                                           | 3         | 16, 17                                  |
| AI does not improve transparency of ethical decision-making                           | 2         | 29                                      |
| There are concerns about trusting a "black box"                                       | 2         | 2, 16                                   |
| Digital inputs into AI tools abstract the individual cases                            | 1         | 35                                      |
| <b>Legal Considerations</b>                                                           |           |                                         |

## List of Codes

|                                                                    |           |           |  |
|--------------------------------------------------------------------|-----------|-----------|--|
| <b>contra</b>                                                      |           |           |  |
| Lack of accountability of AI                                       | 3         | 4, 17, 30 |  |
| Responsibility for information provided by AI is hard to assign    | 2         | 8         |  |
| There are no official certifications for AI                        | 1         | 24        |  |
| Automation of ethical decision-making is currently not ethical     | 1         | 1         |  |
| <b>Other</b>                                                       | <b>20</b> |           |  |
| <u>Processes</u>                                                   |           |           |  |
| <b>contra</b>                                                      |           |           |  |
| Surrogate decision-making in itself is superior to AI alternatives | 2         | 23        |  |
| <u>Development</u>                                                 |           |           |  |
| <b>pro</b>                                                         |           |           |  |
| AI tools enable the collection of patient data                     | 2         | 16        |  |
| Data collected by AI can be used for its development               | 1         | 16        |  |
| <b>contra</b>                                                      |           |           |  |
| AI is being trained based on wrong assumptions                     | 3         | 14, 32    |  |
| Available data not sufficient to train AI to be superior           | 3         | 1, 13, 34 |  |
| Development is resource intensive                                  | 2         | 13, 28    |  |
| Automation of ethical decision-making is technically not feasible  | 2         | 1         |  |
| Subpar implementation of tools hinders motivation to use them      | 1         | 16        |  |
| Development costs outweigh benefits                                | 1         | 34        |  |
| Successful algorithm may hinder its own development                | 1         | 17        |  |
| ML tools not yet fully realized                                    | 1         | 28        |  |
| The role of ethics consultant is difficult to capture in code      | 1         | 32        |  |
